# Supplementary material
Source: PubMed Central journal article supplement (PMC5635603)
Supplement: NIHMS907885-supplement-appendix.pdf [file NIHMS907885-supplement-appendix.pdf]

## Appendix 1. Reference Methods Summary

| <b>Bacterial Vaginosis</b>                                                                             |                  |                                                     |
|--------------------------------------------------------------------------------------------------------|------------------|-----------------------------------------------------|
| <b>Reference Method</b>                                                                                |                  | <b>Final BV RM Result</b>                           |
| Nugent score                                                                                           | Amsel's criteria |                                                     |
| 7-10 (+)                                                                                               | N/Ap             | +                                                   |
| 4-6 (intermediate)                                                                                     | +                | +                                                   |
|                                                                                                        | -                | -                                                   |
| 0-3                                                                                                    | N/Ap             | -                                                   |
| <b><i>Candida</i> spp.</b>                                                                             |                  |                                                     |
| <b>Reference Method</b>                                                                                |                  | <b>Final Candida RM Result</b>                      |
| Bi-directional sequencing                                                                              |                  |                                                     |
| <i>Candida albicans</i> , <i>C. tropicalis</i> , <i>C. parapsilosis</i> ,<br>or <i>C. dubliniensis</i> |                  | Cgroup +                                            |
| <i>Candida glabrata</i>                                                                                |                  | <i>C. glabrata</i> +                                |
| <i>Candida krusei</i>                                                                                  |                  | <i>C. krusei</i> +                                  |
| any other species                                                                                      |                  | Cgroup, <i>C. glabrata</i> , and <i>C. krusei</i> - |
| <b><i>Trichomonas vaginalis</i></b>                                                                    |                  |                                                     |
| <b>Reference Method</b>                                                                                |                  | <b>Final TV RM result</b>                           |
| Wet mount                                                                                              | Culture          |                                                     |
| +                                                                                                      | +                | +                                                   |
| +                                                                                                      | -                | +                                                   |

Gaydos CA, Beqaj S, Schwebke JR, Lebed J, Smith B, Davis TE, et al. Clinical validation of a test for the diagnosis of vaginitis. *Obstet Gynecol* 2017;130.

The authors provided this information as a supplement to their article.

|   |   |   |
|---|---|---|
| - | + | + |
| - | - | - |

+, positive; -, negative; RM, Reference Method

Gaydos CA, Beqaj S, Schwebke JR, Lebed J, Smith B, Davis TE, et al. Clinical validation of a test for the diagnosis of vaginitis. *Obstet Gynecol* 2017;130.

The authors provided this information as a supplement to their article.

**Appendix 2. Evaluable specimens into study. Top left shows eligible participants, bottom left shows evaluable specimens for bacterial vaginosis, top right shows evaluable specimens for *Candida* species, and bottom right shows evaluable specimens for *Trichomonas vaginalis*. RM, reference method; INV, investigational.**

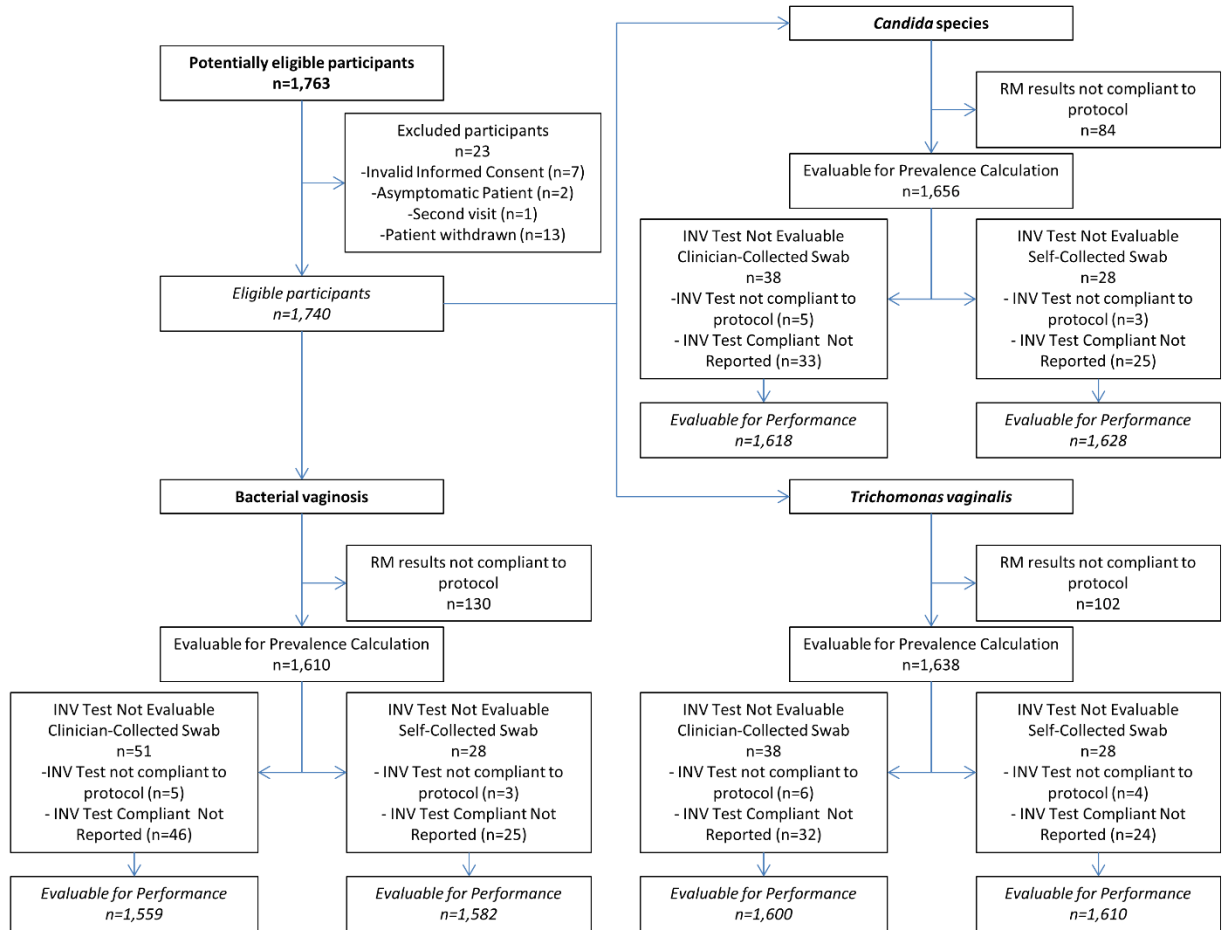

Gaydos CA, Beqaj S, Schwebke JR, Lebed J, Smith B, Davis TE, et al. Clinical validation of a test for the diagnosis of vaginitis. *Obstet Gynecol* 2017;130.

The authors provided this information as a supplement to their article.
